# Supplementary material for: Patient-driven innovations reported in peer-reviewed journals: a scoping review
Source: HighWire-hosted journal article supplement (doi:10.1136/bmjopen-2021-053735), 2022-01-01
Supplement: bmjopen-2021-053735supp002_data_supplement.pdf [file bmjopen-2021-053735supp002_data_supplement.pdf]

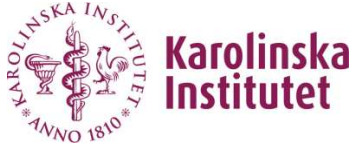

## 1. Medline

Interface: Ovid MEDLINE(R) and Epub Ahead of Print, In-Process & Other Non-Indexed Citations and Daily

Date of Search: 15 October 2019

Number of hits: 3,443

Comment: In Ovid, two or more words are automatically searched as phrases; i.e. no quotation marks are needed

### Field labels

- exp/ = exploded MeSH term
- / = non exploded MeSH term
- .ti,ab,kf. = title, abstract and author keywords
- adjx = within x words, regardless of order
- \* = truncation of word for alternate endings

| #  | Searches                                                                                                                                                                                                                               | Results |
|----|----------------------------------------------------------------------------------------------------------------------------------------------------------------------------------------------------------------------------------------|---------|
| 1  | ((adult child* or patient* or care giver* or caregiver* or carer* or family or husband* or "next of kin*" or partner* or spouse* or user or wife or wives) adj1 (directed or driven or driving or initiated)).ti,ab,kf.                | 4150    |
| 2  | (co creat* or co design* or collaborative creation* or collaborativ* created or "do it yourself" or "doing it for themselves" or diy or e patient* or lead patient* or participatory design* or public driven or superuser*).ti,ab,kf. | 3444    |
| 3  | Patient participation/                                                                                                                                                                                                                 | 24568   |
| 4  | or/1-3                                                                                                                                                                                                                                 | 31910   |
| 5  | Equipment design/                                                                                                                                                                                                                      | 144620  |
| 6  | Inventions/                                                                                                                                                                                                                            | 1720    |
| 7  | Organizational innovation/                                                                                                                                                                                                             | 23978   |
| 8  | Diffusion of Innovation/                                                                                                                                                                                                               | 17239   |
| 9  | (innovat* or invention* or invented).ti,ab,kf.                                                                                                                                                                                         | 128952  |
| 10 | Self-Management/                                                                                                                                                                                                                       | 1492    |
| 11 | exp Self-Help Devices/                                                                                                                                                                                                                 | 11126   |
| 12 | exp Self care/                                                                                                                                                                                                                         | 52825   |
| 13 | (assistive technolog* or co care or self care or self help device* or self management* or self monitor* or self track*).ti,ab,kf.                                                                                                      | 42096   |
| 14 | or/5-13                                                                                                                                                                                                                                | 388764  |
| 15 | 4 and 14                                                                                                                                                                                                                               | 3235    |
| 16 | (co innovat* or patient* innovat* or patient design*).ti,ab,kf.                                                                                                                                                                        | 219     |
| 17 | 15 or 16                                                                                                                                                                                                                               | 3443    |



## 2. Web of Science Core Collection

| Interface: Clarivate Analytics  |            | Field labels                                                                                                                                                                                                                                    |
|---------------------------------|------------|-------------------------------------------------------------------------------------------------------------------------------------------------------------------------------------------------------------------------------------------------|
| Date of Search: 15 October 2019 |            | <ul style="list-style-type: none"> <li>• TS/Topic = title, abstract, author keywords and Keywords Plus</li> <li>• NEAR/x = within x words, regardless of order</li> <li>• * = truncation of word for alternate endings</li> </ul>               |
| Number of hits: 1,486           |            | Note: sometimes "quotation marks" are needed for single search terms to avoid automatic term mapping (lemmatization).                                                                                                                           |
| # 11                            | 1,486      | #10 AND #9                                                                                                                                                                                                                                      |
| # 10                            | 11,179,378 | TS=(disabilit* or disorder* or disease* or health* or medical* or medicine* or patient* or psychiatr*)                                                                                                                                          |
| # 9                             | 4,684      | #8 OR #7                                                                                                                                                                                                                                        |
| # 8                             | 428        | TS=("co innovat*" or "patient* innovat*" or "patient design**")                                                                                                                                                                                 |
| # 7                             | 4,301      | #6 AND #3                                                                                                                                                                                                                                       |
| # 6                             | 554,001    | #5 OR #4                                                                                                                                                                                                                                        |
| # 5                             | 56,965     | TOPIC: (("assistive technolog*" or "co care" or "self care" or "self help device*" or "self management*" or "self monitor*" or "self track**"))                                                                                                 |
| # 4                             | 498,702    | TOPIC: ((innovat* or invention* or invented))                                                                                                                                                                                                   |
| # 3                             | 42,438     | #2 OR #1                                                                                                                                                                                                                                        |
| # 2                             | 20,170     | TS=("co creat*" or "co design*" or "collaborative creation*" or "collaborativ* created" or "do it yourself" or "doing it for themselves" or diy or "e patient*" or "lead patient*" or "participatory design*" or "public driven" or superuser*) |
| # 1                             | 22,369     | TOPIC: (((("adult child*" or patient* or "care giver*" or caregiver* or carer* or family or husband* or "next of kin*" or partner* or spouse* or user or wife or wives) NEAR/1 (directed or driven or driving or initiated)))                   |



### 3. Psycinfo

| #  | Searches                                                                                                                                                                                                                               | Results |
|----|----------------------------------------------------------------------------------------------------------------------------------------------------------------------------------------------------------------------------------------|---------|
| 1  | exp client participation/                                                                                                                                                                                                              | 2032    |
| 2  | ((adult child* or patient* or care giver* or caregiver* or carer* or family or husband* or "next of kin*" or partner* or spouse* or user or wife or wives) adj1 (directed or driven or driving or initiated)).ti,ab,id.                | 1154    |
| 3  | (co creat* or co design* or collaborative creation* or collaborativ* created or "do it yourself" or "doing it for themselves" or diy or e patient* or lead patient* or participatory design* or public driven or superuser*).ti,ab,id. | 3267    |
| 4  | or/1-3                                                                                                                                                                                                                                 | 6414    |
| 5  | innovation/                                                                                                                                                                                                                            | 12769   |
| 6  | exp product design/                                                                                                                                                                                                                    | 5606    |
| 7  | (innovat* or invention* or invented).ti,ab,id.                                                                                                                                                                                         | 62414   |
| 8  | or/5-7                                                                                                                                                                                                                                 | 67742   |
| 9  | exp self-management/                                                                                                                                                                                                                   | 6385    |
| 10 | self-monitoring/                                                                                                                                                                                                                       | 2883    |
| 11 | exp assistive technology/                                                                                                                                                                                                              | 9925    |
| 12 | (assistive technolog* or co care or self care or self help device* or self management* or self monitor* or self track*).ti,ab,id.                                                                                                      | 24688   |
| 13 | or/5-12                                                                                                                                                                                                                                | 103132  |
| 14 | 4 and 13                                                                                                                                                                                                                               | 683     |
| 15 | (co innovat* or patient* innovat* or patient design*).ti,ab,id.                                                                                                                                                                        | 82      |
| 16 | 14 or 15                                                                                                                                                                                                                               | 760     |



## 4. Cinahl

| #   | Searches                                                                                                                                                                                                                                                                                                                                                                                                                                                                                           | Results |
|-----|----------------------------------------------------------------------------------------------------------------------------------------------------------------------------------------------------------------------------------------------------------------------------------------------------------------------------------------------------------------------------------------------------------------------------------------------------------------------------------------------------|---------|
| S14 | S12 OR S13                                                                                                                                                                                                                                                                                                                                                                                                                                                                                         | 2,391   |
| S13 | TI ("co innovat*" or "patient* innovat*" or "patient design*") OR AB ("co innovat*" or "patient* innovat*" or "patient design*")                                                                                                                                                                                                                                                                                                                                                                   | 144     |
| S12 | S4 AND S11                                                                                                                                                                                                                                                                                                                                                                                                                                                                                         | 2,255   |
| S11 | S5 OR S6 OR S7 OR S8 OR S9 OR S10                                                                                                                                                                                                                                                                                                                                                                                                                                                                  | 184,189 |
| S10 | TI ("assistive technolog*" or "co care" or "self care" or "self help device*" or "self management*" or "self monitor*" or "self track*") OR AB ("assistive technolog*" or "co care" or "self care" or "self help device*" or "self management*" or "self monitor*" or "self track*")                                                                                                                                                                                                               | 29,539  |
| S9  | (MH "Assistive Technology Devices+")                                                                                                                                                                                                                                                                                                                                                                                                                                                               | 31,412  |
| S8  | (MH "Self Care+")                                                                                                                                                                                                                                                                                                                                                                                                                                                                                  | 44,835  |
| S7  | TI (innovat* or invention* or invented) OR AB (innovat* or invention* or invented)                                                                                                                                                                                                                                                                                                                                                                                                                 | 49,209  |
| S6  | (MH "Diffusion of Innovation+")                                                                                                                                                                                                                                                                                                                                                                                                                                                                    | 12,735  |
| S5  | (MH "Equipment Design+")                                                                                                                                                                                                                                                                                                                                                                                                                                                                           | 43,859  |
| S4  | S1 OR S2 OR S3                                                                                                                                                                                                                                                                                                                                                                                                                                                                                     | 23,406  |
| S3  | (MH "Consumer Participation")                                                                                                                                                                                                                                                                                                                                                                                                                                                                      | 17,926  |
| S2  | TI ("co design*" or "co creat*" or "collaborative creation*" or "collaborativ* created" or "do it yourself" or "doing it for themselves" or diy or "e patient*" or "lead patient*" or "participatory design*" or "public driven" or superuser*) OR AB ("co design*" or "co creat*" or "collaborative creation*" or "collaborativ* created" or "do it yourself" or "doing it for themselves" or diy or "e patient*" or "lead patient*" or "participatory design*" or "public driven" or superuser*) | 2,321   |
| S1  | TI (("adult child*" or patient* or "care giver*" or caregiver* or carer* or family or husband* or "next of kin*" or partner* or spouse* or user or wife or wives) N1                                                                                                                                                                                                                                                                                                                               | 3,379   |

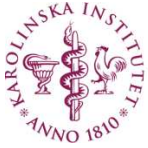

**Karolinska  
Institutet**

|                                                                                                                                                                                                                                                                    |  |
|--------------------------------------------------------------------------------------------------------------------------------------------------------------------------------------------------------------------------------------------------------------------|--|
| (directed or driven or driving or initiated)) OR AB ("adult child*" or patient* or "care giver*" or caregiver* or carer* or family or husband* or "next of kin*" or partner* or spouse* or user or wife or wives) N1 (directed or driven or driving or initiated)) |  |
|--------------------------------------------------------------------------------------------------------------------------------------------------------------------------------------------------------------------------------------------------------------------|--|
